# Supplementary material
Source: publisher figshare collection journal article supplement (https://frontiersin.figshare.com/ndownloader/files/12548600)
Supplement: Supplementary file [file 12548600]

# **Enhancing production of pinene in *Escherichia coli* by using a combination of tolerance, evolution and modular co-culture engineering**

*Fu-Xing Niu, Xin He, Ya-Qin Wu, Jian-Zhong Liu\**

*Institute of Synthetic Biology, Biomedical Center, Guangdong Province Key Laboratory of Improved Variety Reproduction in Aquatic Economic Animals and South China Sea Bio-Resource Exploitation and Utilization Collaborative Innovation Center, School of Life Sciences, Sun Yat-sen University, Guangzhou 510275, China*

\*Corresponding author: Institute of Synthetic Biology, School of Life Science, Sun Yat-Sen University, Guangzhou 510275, P.R. China. Phone: +86-20-84110115. Fax: +86-20-84036461. E-mail address: lssljz@mail.sysu.edu.cn (J. Z. Liu)

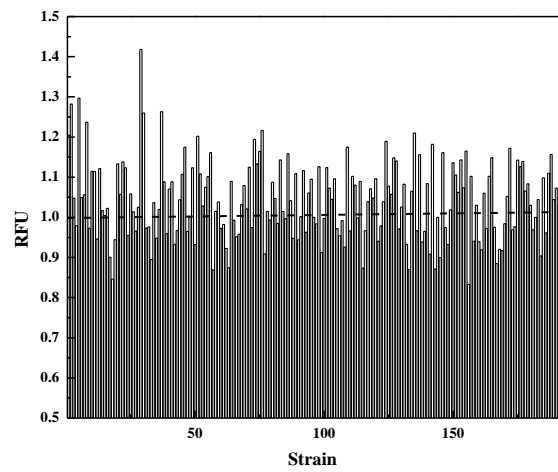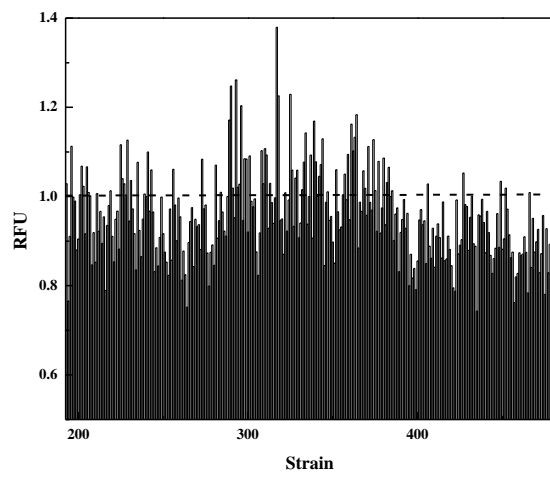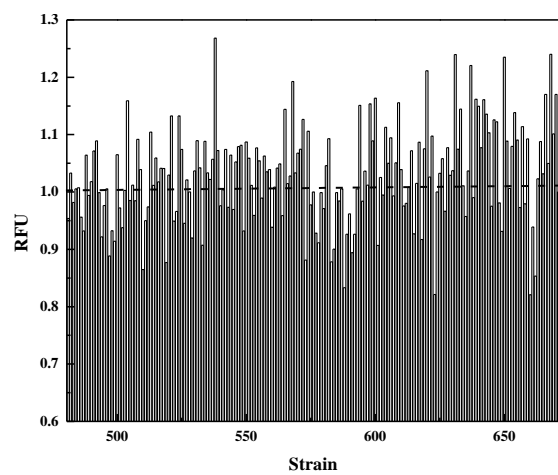

Suppl. Fig. 1 The fluorescent strength of the adaptive laboratory evolution strains

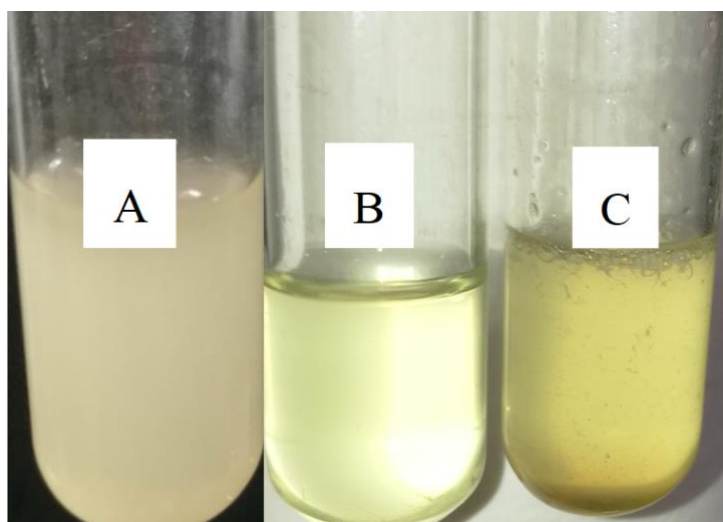

Suppl. Fig. 2 Growth of *E. coli* YZ-3-A-T and its mutants after ARTP mutagenesis. *E. coli* YZ-3-A-T were cultured in the presence of 2% pinene (A) and 35 mM fosmidomycin (B); the mutants were cultured in the presence of 35 mM fosmidomycin and 2% pinene (C)

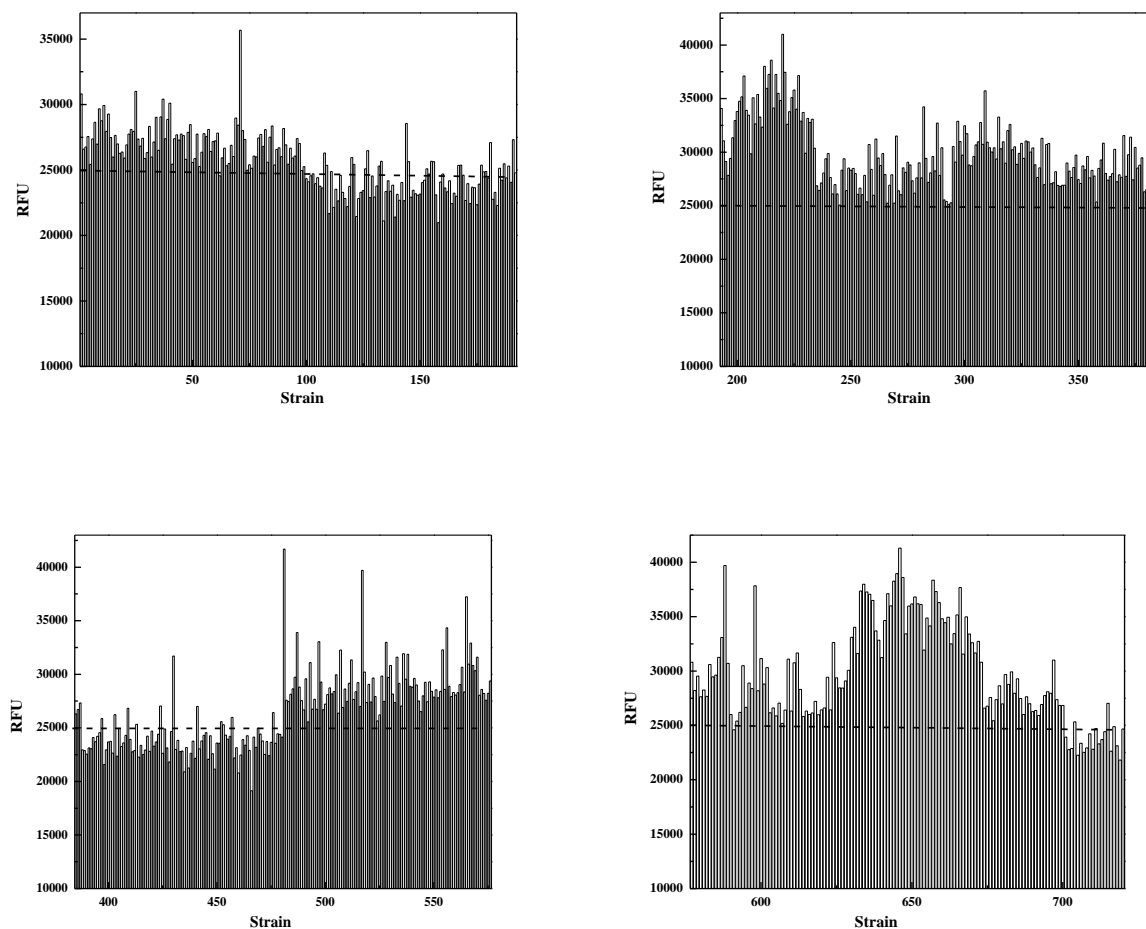

Suppl. Fig. 3 The fluorescent strength of the selected mutant resistant to fosmidomycin

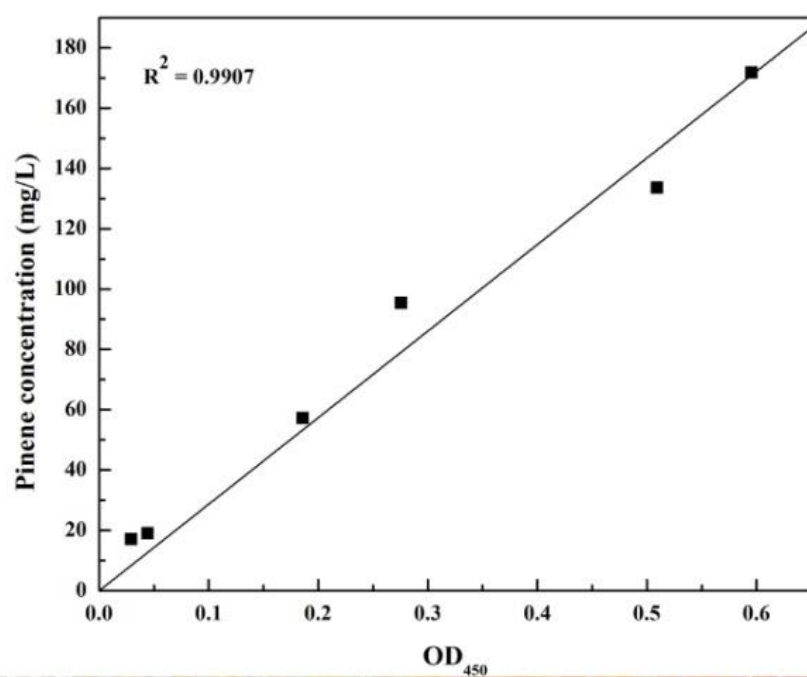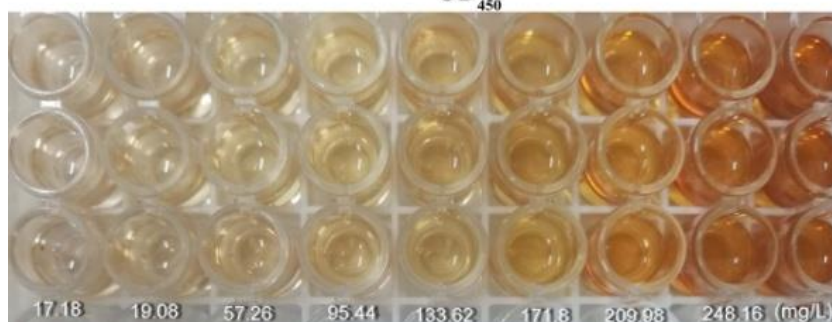

Suppl. Fig. 4 The relationship between the OD<sub>450</sub> value of the pinene reaction solution with concentrated sulfuric acid and pinene concentration

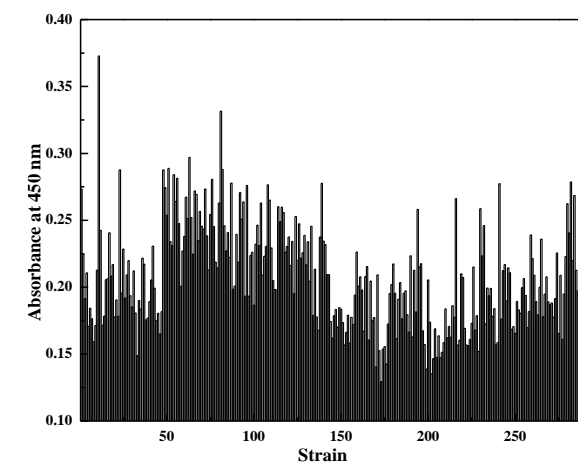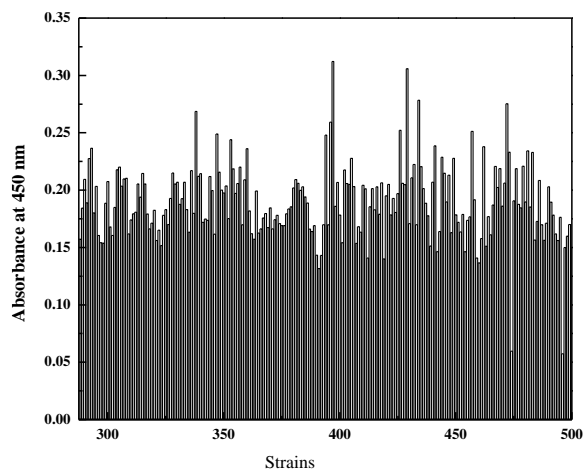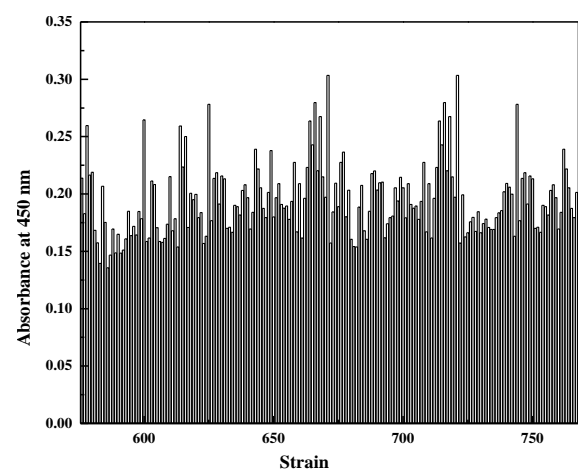

Suppl. Fig. 5 Absorbance at 450 nm of the TIGR libraries

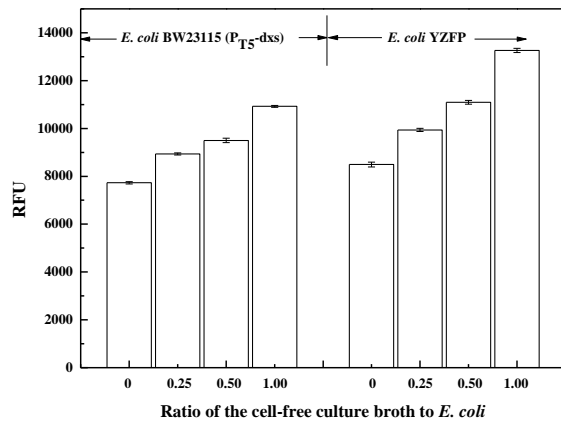

Suppl. Fig. 6 Effect of the cell-free culture broth of *E. coli* MEVI on fluorescence strength in *E. coli*. *E. coli* harboring pP<sub>rstA</sub>-GFP was incubated at 30°C and 130 rpm until an OD<sub>600</sub> of 4.0 was reached. Then the cell-free culture broth of *E. coli* MEVI cultured overnight was added. The cultures were incubated for additional 12 h and then the fluorescence strengths were assayed.
